# Supplementary material for: One-dimensional metal-azido complex constructed by a double EO azido bridged trinuclear nickel(ii) unit: synthesis, structure and magnetic properties
Source: Royal Society of Chemistry journal article supplement (doi:10.1039/b915616j), 2009-11-05
Supplement: b915616j.pdf [file b915616j.pdf]

## Electronic Supplementary Information

### One-Dimensional Metal-azido Complex Constructed by Double EO Azido Bridged Trinuclear Nickel(II) Unit: Synthesis, Structure, and Magnetic Properties

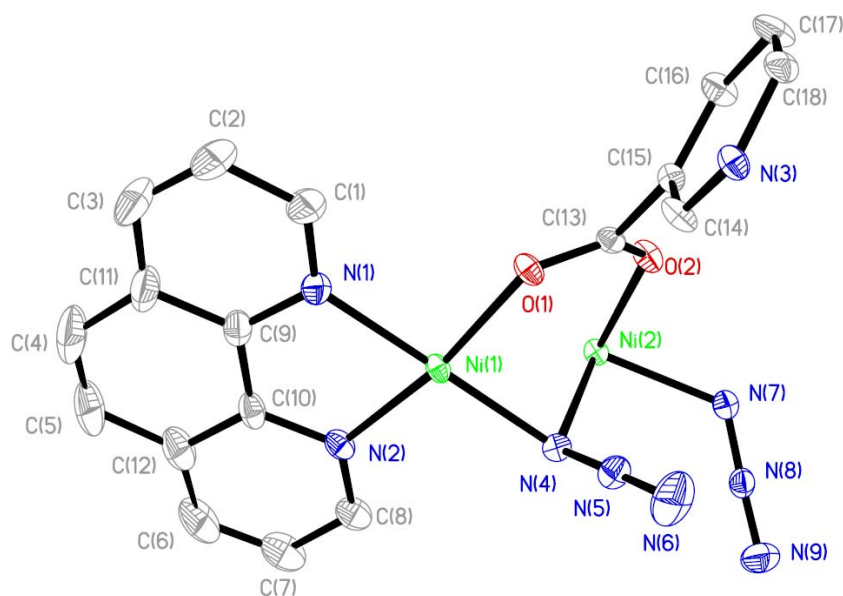

Fig. S1 The asymmetric unit of **1**
